# Supplementary material for: Thirty-minute preparation of microporous polyimides with large surface areas for ammonia adsorption
Source: Royal Society of Chemistry journal article supplement (doi:10.1039/d0gc02794d), 2020-01-01
Supplement: d0gc02794d1.pdf [file d0gc02794d1.pdf]

## Supporting Information

### **Thirty-minute preparation of microporous polyimides with high surface area for ammonia adsorption**

Tingting Zhu,<sup>a†</sup> Baoyou Pei,<sup>b†</sup> Tuo Di,<sup>a</sup> Yunxia Xia,<sup>a</sup> Tiesheng Li<sup>c</sup> and Lei Li<sup>\*a</sup>

a College of Materials and Fujian Provincial Key Laboratory of Materials Genome, Xiamen University, Xiamen, 361005, P.R. China

b Department of Materials Science and Engineering, Huaqiao University, Xiamen, 361021, P.R. China

c College of Chemistry and Molecular Engineering, Zhengzhou University, Zhengzhou, 450001, P.R. China

† Tingting Zhu and Baoyou Pei contributed equally to this work.

E-mail: lilei@xmu.edu.cn

Tel: +86-592-2186296

Fax: +86-592-2183937

Table S1. Polymerization conditions for the preparation of MPIs.

| Samples    | Triamines   |             |             | NCDH<br>(g) | DPS<br>(g) | Polymerization<br>conditions |
|------------|-------------|-------------|-------------|-------------|------------|------------------------------|
|            | TAPA<br>(g) | TAPT<br>(g) | TAPB<br>(g) |             |            |                              |
| MPI-A-30   | 0.0581      | -           | -           | 0.0805      | 0.2772     | 325 °C, 0.5 h                |
| MPI-T-30   | -           | 0.0709      | -           | 0.0805      | 0.3028     | 325 °C, 0.5 h                |
| MPI-B-30   | -           | -           | 0.0703      | 0.0805      | 0.3016     | 325 °C, 0.5 h                |
| MPI-A-60   | 0.0581      | -           | -           | 0.0805      | 0.2772     | 325 °C, 1.0 h                |
| MPI-A-90   | 0.0581      | -           | -           | 0.0805      | 0.2772     | 325 °C, 1.5 h                |
| MPI-A-30-1 | 0.1452      | -           | -           | 0.2011      | 0.6926     | 325 °C, 0.5 h                |
| MPI-A-30-2 | 0.1161      | -           | -           | 0.1609      | 0.5540     | 325 °C, 0.5 h                |
| MPI-A-30-3 | 0.0871      | -           | -           | 0.1207      | 0.4156     | 325 °C, 0.5 h                |
| MPI-A-30-4 | 0.0581      | -           | -           | 0.0805      | 0.2772     | 325 °C, 0.5 h                |

Table S2. Elemental analysis of MPIs

| Samples         | Experimental (wt%) |      |       |      | Theoretical (wt%) |      |       |   |
|-----------------|--------------------|------|-------|------|-------------------|------|-------|---|
|                 | C                  | H    | N     | S    | C                 | H    | N     | S |
| <b>MPI-A-30</b> | 68.45              | 3.84 | 8.48  | 1.20 | 73.35             | 2.84 | 8.77  | 0 |
| <b>MPI-T-30</b> | 66.08              | 3.44 | 11.01 | 1.51 | 71.79             | 2.56 | 11.97 | 0 |
| <b>MPI-B-30</b> | 72.35              | 3.27 | 5.69  | 0.85 | 77.25             | 3.00 | 6.00  | 0 |

Table S3. Elemental analysis of pure DPS and recovered DPS.

| Samples      | Experimental (wt%) |      |      |       | Theoretical (wt%) |      |   |       |
|--------------|--------------------|------|------|-------|-------------------|------|---|-------|
|              | C                  | H    | N    | S     | C                 | H    | N | S     |
| <b>DPS</b>   | 65.02              | 4.39 | 0.29 | 15.52 | 66.06             | 4.59 | 0 | 14.68 |
| <b>DPS-1</b> | 65.00              | 4.18 | 0.31 | 14.84 | -                 | -    | - | -     |
| <b>DPS-2</b> | 64.92              | 4.43 | 0.34 | 14.85 | -                 | -    | - | -     |
| <b>DPS-3</b> | 64.91              | 4.34 | 0.36 | 14.71 | -                 | -    | - | -     |
| <b>DPS-4</b> | 65.12              | 4.54 | 0.28 | 14.57 | -                 | -    | - | -     |

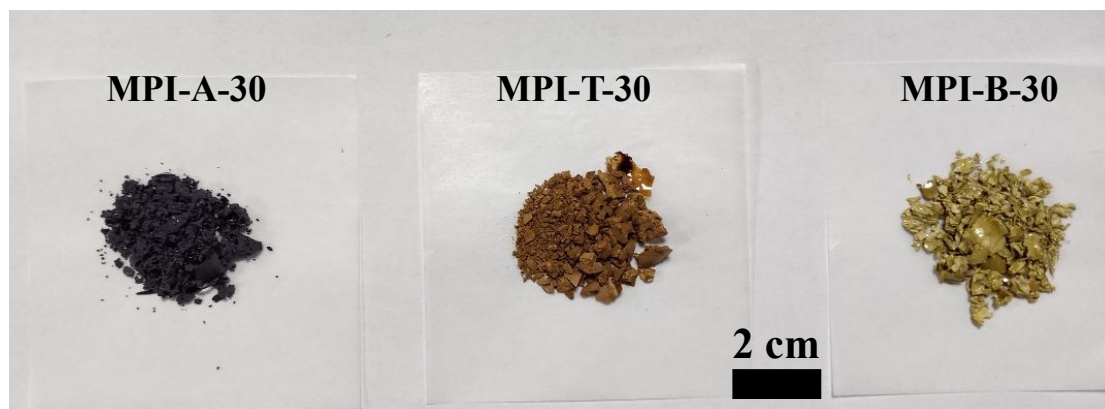

Figure S1. Digital images of as-prepared MPI-A-30, MPI-T-30 and MPI-B-30.

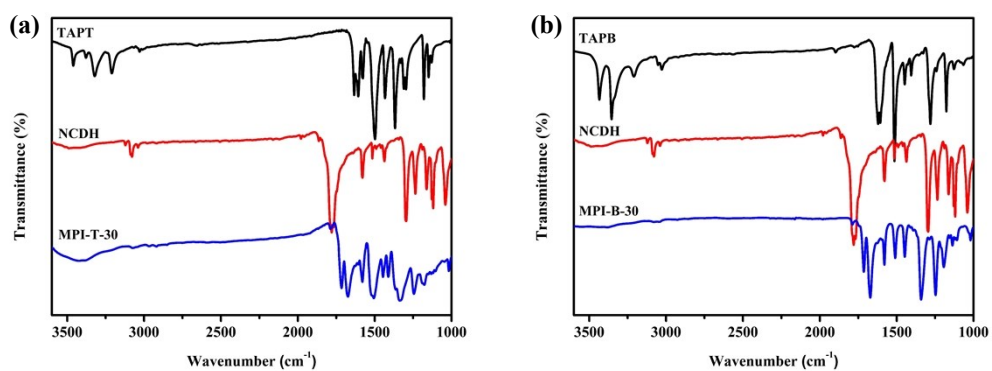

Figure S2. The FITR spectra of TAPT, NCDH and MPI-A-30 (a), as well as TAPB and MPI-B-30 (b).

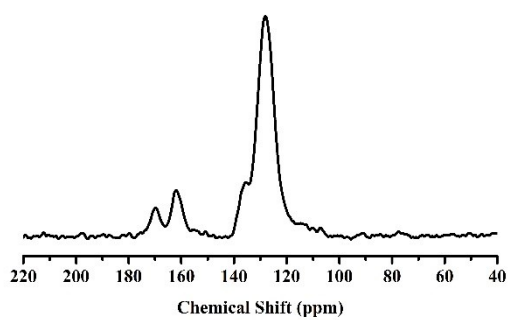

Figure S3. Solid state  $^{13}\text{C}$  cross-polarization magic-angle spinning (CP/MAS) NMR spectra of MPI-T-30.

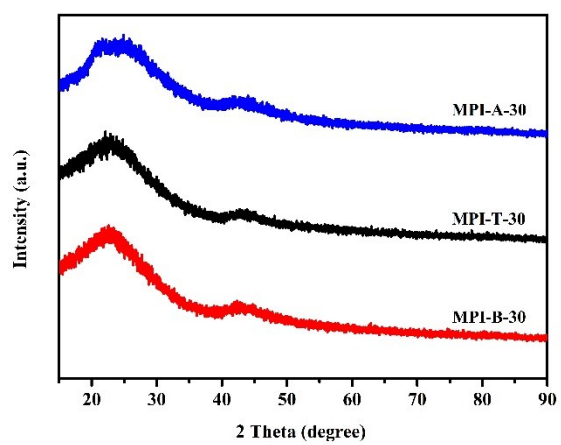

Figure S4. X-ray diffraction spectra of MPI-A-30, MPI-T-30 and MPI-B-30.



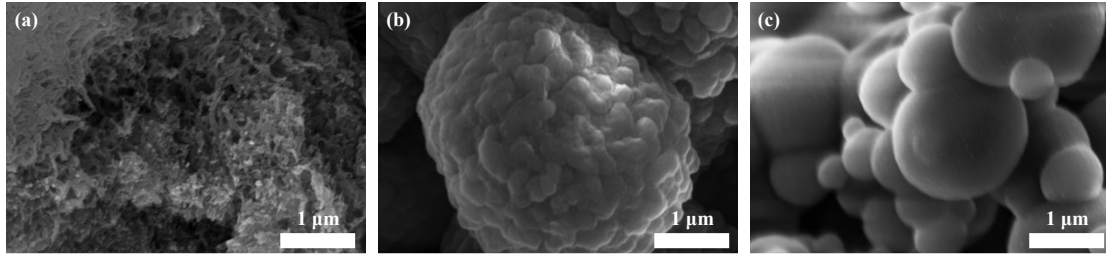

Figure S5. SEM images of MPI-A-30 (a), MPI-T-30 (b) and MPI-B-30 (c).

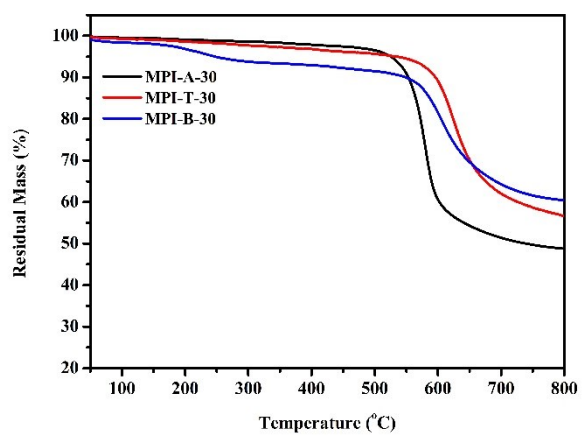

Figure S6. TGA curves of MPI-A-30, MPI-T-30 and MPI-B-30.

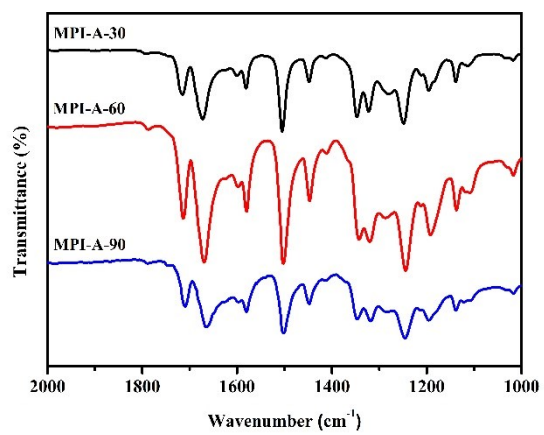

Figure S7. The FTIR spectra of MPI-A-30, MPI-A-60 and MPI-A-90.

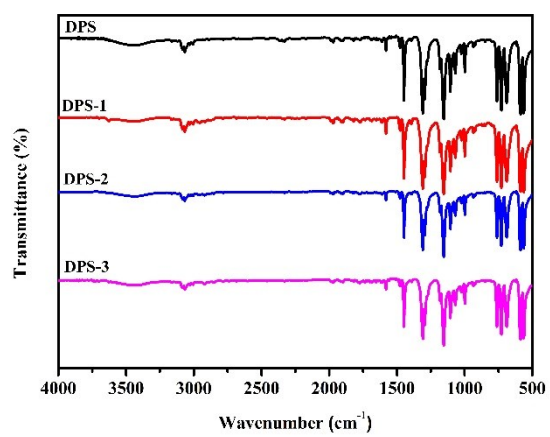

Figure S8. FTIR spectra of pure DPS and DPS-m (m represents the number of cycles).

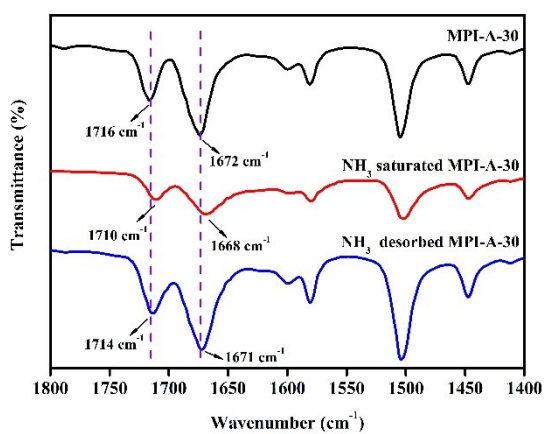

Figure S9. The FTIR spectra of MPI-A-30, NH<sub>3</sub> saturated MPI-A-30 and NH<sub>3</sub> desorbed MPI-A-30.

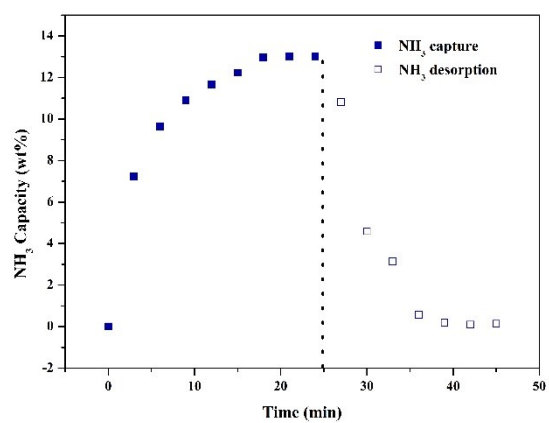

Figure S10. NH<sub>3</sub> adsorption and desorption curves of activated carbon.

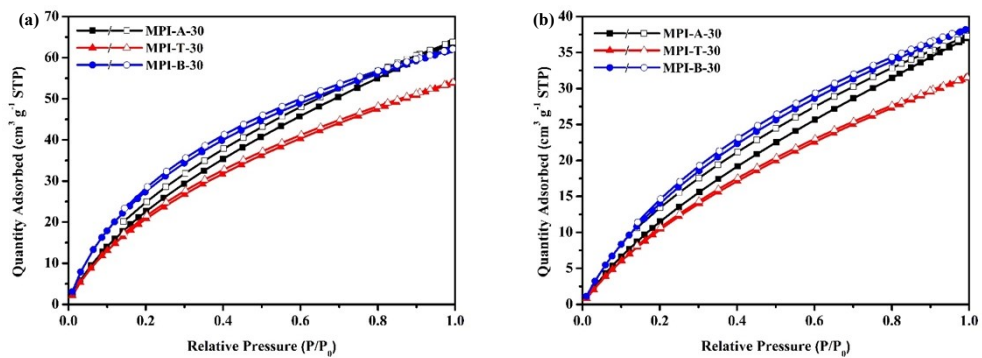

Figure S11. CO<sub>2</sub> adsorption-desorption isotherms of MPIs at 273 K (a) and 298 K (b).

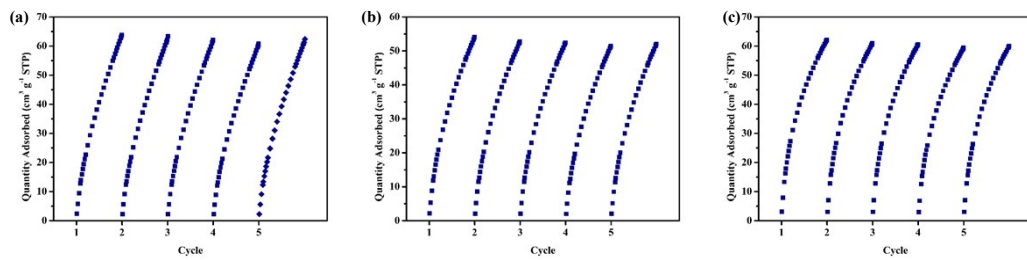

Figure S12. Five cycles of CO<sub>2</sub> adsorption at 237 K for MPI-A-30 (a), MPI-T-30 (b) and MPI-B-30 (c).



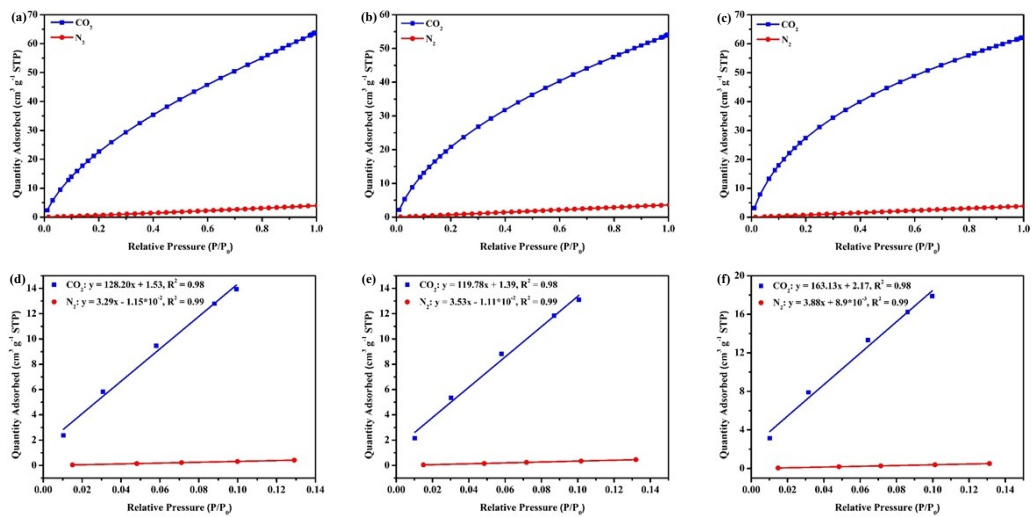

Figure S13. CO<sub>2</sub> and N<sub>2</sub> adsorption isotherms at 273 K for MPI-A-30 (a), MPI-T-30 (b) and MPI-B-30 (c). CO<sub>2</sub>/N<sub>2</sub> selectivities of MPI-A-30 (d), MPI-T-30 (e) and MPI-B-30 (f).

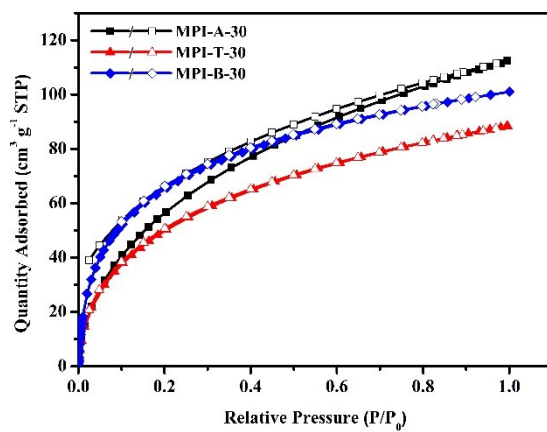

Figure S14. H<sub>2</sub> adsorption isotherms of MPI-A-30, MPI-T-30 and MPI-B-30.

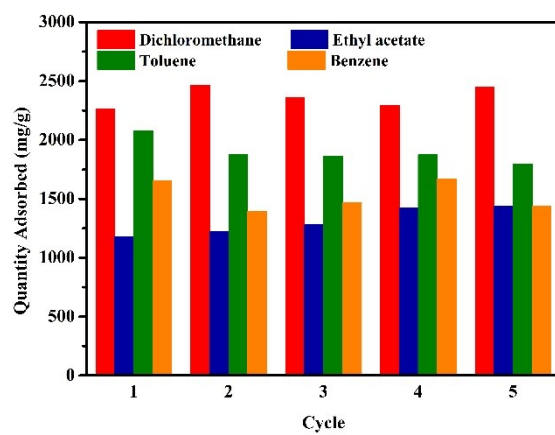

Figure S15. Volatile organic compound (VOC) uptake of MPI-A-30 at room temperature and relative saturation pressure.
